# Supplementary material
Source: PubMed Central journal article supplement (PMC3370481)
Supplement: supp_78.13.4659_AEM-AEM00332-12-s01.pdf [file supp_78.13.4659_AEM-AEM00332-12-s01.pdf]

Supplemental Table 1. List of supplementary strains included in this study

|                             | Isolation    |                     |                |                        |                 |                     |
|-----------------------------|--------------|---------------------|----------------|------------------------|-----------------|---------------------|
|                             | n°           | Origin <sup>a</sup> | Host           | Clinical manifestation | Year            | Source <sup>b</sup> |
| <i>M. agalactiae</i>        | 4023         | FR 82               | Ovine          | none                   | 1988            | BTM                 |
| <i>M. agalactiae</i>        | 4054         | FR 58               | Caprine        | Mastitis               | 1986            | Milk                |
| <u><i>M. agalactiae</i></u> | <u>4206</u>  | <u>FR 64</u>        | <u>Ovine</u>   | <u>Mastitis</u>        | <u>1981</u>     | <u>Milk</u>         |
| <i>M. agalactiae</i>        | 4212         | FR 84               | Ovine          | Mastitis               | 1986            | Milk                |
| <i>M. agalactiae</i>        | 4867         | Spain               | Caprine        | Mastitis               | <1990           | Milk                |
| <b><i>M. agalactiae</i></b> | <b>4908</b>  | <b>FR 73</b>        | <b>Caprine</b> | <b>Mastitis</b>        | <b>&lt;1990</b> | <b>Milk</b>         |
| <i>M. agalactiae</i>        | 5650         | FR 81               | Ovine          | Mastitis               | <1991           | Milk                |
| <i>M. agalactiae</i>        | 6355         | Spain               | Ovine          | Arthritidis            | 1992            | Joint               |
| <i>M. agalactiae</i>        | 6833         | Italy               | Caprine        | Mastitis               | <1993           | Milk                |
| <i>M. agalactiae</i>        | 7320         | Greece              | Ovine          | Mastitis               | 1987            | Milk                |
| <i>M. agalactiae</i>        | 7337         | Greece              | Caprine        | Mastitis               | 1987            | Milk                |
| <i>M. agalactiae</i>        | 13462        | FR 07               | Caprine        | Pneumonia              | 2003            | Lung                |
| <i>M. agalactiae</i>        | 14668        | FR 84               | Caprine        | Pneumonia              | 2006            | Lung                |
| <i>M. agalactiae</i>        | 14780        | FR 64               | Ovine          | none                   | 2007            | BTM                 |
| <i>M. agalactiae</i>        | 14793        | Italy (Sardinia)    | Ovine          | Mastitis               | nk              | Milk                |
| <u><i>M. agalactiae</i></u> | <u>14843</u> | <u>FR 64</u>        | <u>Ovine</u>   | <u>none</u>            | <u>2007</u>     | <u>BTM</u>          |
| <i>M. agalactiae</i>        | 14962        | FR 20               | Ovine          | Mastitis               | 2008            | Mammary gland       |
| <i>M. agalactiae</i>        | 14968        | FR 69               | Caprine        | Mastitis               | 2008            | BTM                 |
| <i>M. agalactiae</i>        | 15122        | FR 84               | Caprine        | Mastitis               | 2008            | Milk                |
| <i>M. agalactiae</i>        | 15241        | FR 14               | Caprine        | Mastitis               | 2009            | BTM                 |
| <i>M. agalactiae</i>        | 15242        | FR 86               | Caprine        | Mastitis               | 2009            | Milk                |
| <b><i>M. agalactiae</i></b> | <b>15291</b> | <b>FR 73</b>        | <b>Caprine</b> | <b>none</b>            | <b>1987</b>     | <b>Joint</b>        |
| <i>M. bovis</i>             | 6817         | Italy               | Bovine         | Pneumonia              | <1993           | Lung                |
| <i>M. bovis</i>             | PG45 (TS)    | US                  | Bovine         | Mastitis               | 1962            | nk                  |

<sup>a</sup> Origin refers to the country of isolation and when in France (FR) also to the code of the department (administrative division).

<sup>b</sup> BTM, Bulk Tank Milk; nk, not known

Strains in bold are representative of the last outbreak of CA in the Savoy department (FR 73). Underscored strains are representative of the current ongoing CA episode in the Pyrénées Atlantiques department (FR 64).

Supplemental Table S2. CDSs identification in the prophage of *M. agalactiae* 14628

| Mnemonic (strand) <sup>a</sup> | Product <sup>b</sup>                                                   | Length <sup>c</sup> | <i>M. conjunctivae</i><br>(similarity %) <sup>d</sup> | <i>M. bovigentialium</i><br>(similarity %) <sup>d</sup> |
|--------------------------------|------------------------------------------------------------------------|---------------------|-------------------------------------------------------|---------------------------------------------------------|
| MAGb_2930 (+)                  | HP                                                                     | 204                 |                                                       |                                                         |
| MAGb_2940 (-)                  | CHP, putative HNH endonuclease, predicted transmembrane protein        | 174                 | MCJ_005070 (49.7) <sup>f</sup>                        | MBVG_6650 (55.4)                                        |
| MAGb_2950 (+)                  | CHP, predicted ATP-dependent endonuclease of the OLD family            | 346                 |                                                       | MBVG_6660 (46.7)                                        |
| MAGb_2960 (+)                  | CHP, putative metallo-hydrolase/oxidoreductase                         | 278                 |                                                       | MBVG_6670 (50.2)                                        |
| MAGb_2970 (+)                  | CHP                                                                    | 121                 |                                                       | MBVG_6680 (46.9)                                        |
| MAGb_2980 (+)                  | CHP, putative DEAD-like helicase                                       | 447                 | MCJ_005050 (50.9)                                     | MBVG_6690 (72.0)                                        |
| MAGb_2990 (+)                  | N6-adenine DNA methyltransferase                                       | 294                 |                                                       | MBVG_6720 (37.4)                                        |
| MAGb_3000 (+)                  | CHP                                                                    | 206                 |                                                       |                                                         |
| MAGb_3010 (+)                  | CHP, putative C-5 cytosine-specific DNA methyltransferase <sup>e</sup> | 256                 |                                                       | MBVG_6630 (41.8)                                        |
| MAGb_3020 (+)                  | CHP                                                                    | 85                  |                                                       |                                                         |
| MAGb_3030 (+)                  | HP                                                                     | 91                  |                                                       |                                                         |
| MAGb_3040 (+)                  | HP                                                                     | 87                  |                                                       |                                                         |
| MAGb_3050 (+)                  | CHP, putative DUF669 family phage protein                              | 175                 | MCJ_005040 (41.6)                                     | MBVG_6710 (59.3)                                        |
| MAGb_3060 (+)                  | CHP, putative phage DNA polymerase                                     | 669                 |                                                       | MBVG_6730 (80.4)                                        |
| MAGb_3070 (+)                  | CHP, putative phage/plasmid primase                                    | 676                 | MCJ_005030 (51.3)                                     | MBVG_6740 (70.6)                                        |
| MAGb_3080 (-)                  | CHP, predicted transmembrane protein                                   | 201                 |                                                       | MBVG_6750 (65.6)                                        |
| MAGb_3090 (-)                  | CHP, predicted transmembrane protein                                   | 191                 | MCJ_004770 (41.7)                                     | MBVG_6760 (75.5)                                        |
| MAGb_3100 (-)                  | HP                                                                     | 66                  |                                                       |                                                         |
| MAGb_3110 (-)                  | CHP                                                                    | 125                 | MCJ_004790 (50.4)                                     | MBVG_6770 (68.0)                                        |
| MAGb_3120 (+)                  | CHP                                                                    | 1008                |                                                       | MBVG_6780 (45.7)                                        |
| MAGb_3130 (+)                  | HP                                                                     | 170                 |                                                       |                                                         |
| MAGb_3140 (-)                  | CHP                                                                    | 531                 | MCJ_004820 (50.7)                                     | MBVG_6800 (70.6)                                        |
| MAGb_3150 (-)                  | CHP                                                                    | 307                 | MCJ_004830 (61.7)                                     | MBVG_6810 (75.0)                                        |
| MAGb_3160 (-)                  | CHP                                                                    | 132                 | MCJ_004850 (43.0)                                     | MBVG_6830 (61.8)                                        |
| MAGb_3170 (-)                  | CHP                                                                    | 154                 | MCJ_004860 (57.6)                                     | MBVG_6840 (67.3)                                        |
| MAGb_3180 (-)                  | CHP                                                                    | 146                 | MCJ_004870 (46.4)                                     | MBVG_6850 (62.3)                                        |
| MAGb_3190 (-)                  | CHP                                                                    | 184                 |                                                       | MBVG_6860 (54.7)                                        |
| MAGb_3200 (-)                  | CHP                                                                    | 882                 | MCJ_004890 (35.8)                                     | MBVG_6870 (36.8)                                        |
| MAGb_3210 (-)                  | CHP                                                                    | 112                 | MCJ_004900 (55.6)                                     | MBVG_6880 (57.1)                                        |
| MAGb_3220 (-)                  | CHP, putative phage prohead protein                                    | 618                 | MCJ_004910 (41.5)                                     | MBVG_6890 (74.4)                                        |
| MAGb_3230 (-)                  | CHP, putative phage portal protein                                     | 404                 | MCJ_004920 (57.5)                                     | MBVG_6900 (79.8)                                        |
| MAGb_3240 (-)                  | CHP, putative terminase large subunit                                  | 601                 | MCJ_004940 (64.7)                                     | MBVG_6910 (79.3)                                        |
| MAGb_3250 (-)                  | CHP                                                                    | 199                 |                                                       | MBVG_6920 (63.4)                                        |
| MAGb_3260 (-)                  | CHP                                                                    | 53                  |                                                       | MBVG_6930 (53.2)                                        |
| MAGb_3270 (-)                  | Integrase – recombinase ( <i>Xer</i> )                                 | 250                 |                                                       | MBVG_6940 (64.8)                                        |

<sup>a</sup> CDSs are designated by the mnemonic codification used in the Molligen 3.0 database and their orientation in the genome is indicated in parenthesis.

<sup>b</sup> Hypothetical proteins (HP) have no homolog outside the *M. agalactiae* species. Conserved hypothetical proteins (CHP) share sequence similarity with proteins of unknown function identified in mollicutes or other bacteria.

<sup>c</sup> CDS length is given in nucleotides.

<sup>d</sup> Homolog CDSs in *M. conjunctivae* HRC/581T and *M. bovigentialium* cl-51080. The global similarity was calculated using the EMBOSS Needle global alignment tool. Pairwise alignments of protein sequences were run with default parameters. Protein alignments with a score < 35% are not indicated.

<sup>e</sup> Similar to C5 methylase MarMP of *M. arthritidis* bacteriophage MAV1 (global similarity = 59.2 %).

<sup>f</sup> An alternative start codon was chosen for MCJ\_005070 (genomic position 582226 instead of 582628).

Supplemental Table S3. List of CDSs from *M. agalactiae* strain 14628 that are not present in the already sequenced *M. agalactiae* strains PG2 and 5632.

| Mnemonic  | Feature type | Product                                    | Mycoplasmal species and strains with BBH <sup>a</sup> |                                |
|-----------|--------------|--------------------------------------------|-------------------------------------------------------|--------------------------------|
|           |              |                                            | All genomes                                           | Without <i>M. agalactiae</i> / |
| MAGb_0410 | pseudogene   | HP (N-term), no predicted function         | <i>M. bovis</i> PG45 (_0475)                          | No hit                         |
| MAGb_0420 | pseudogene   | HP (C-term), no predicted function         | <i>M. bovis</i> PG45 (_0475)                          | No hit                         |
| MAGb_0630 | CDS          | Type III RMS, endonuclease                 | <i>M. pulmonis</i> UAB CTIP                           | <i>M. pulmonis</i> UAB CTIP    |
| MAGb_0640 | CDS          | Type III RMS, methylase                    | <i>M. pulmonis</i> UAB CTIP                           | <i>M. pulmonis</i> UAB CTIP    |
| MAGb_0900 | CDS          | Type II RMS, endonuclease                  | <i>M. bovis</i> PG45 (_0366)                          | no                             |
| MAGb_0910 | CDS          | Type II RMS, methylase                     | <i>M. bovis</i> PG45 (_0365)                          | <i>MmmSC</i> PG1               |
| MAGb_2500 | pseudogene   | CHP (N-term), predicted lipoprotein        | No hit                                                | No hit                         |
| MAGb_2520 | pseudogene   | HP (N-term), predicted lipoprotein         | No hit                                                | No hit                         |
| MAGb_2530 | pseudogene   | HP (C-term), predicted lipoprotein         | No hit                                                | No hit                         |
| MAGb_2610 | pseudogene   | Transposase                                | <i>M. bovis</i> PG45 (_0570)                          | No hit                         |
| MAGb_2620 | CDS          | Type II RMS, endonuclease                  | <i>M. bovis</i> PG45 (_0721)                          | <i>Mmc</i> GM12                |
| MAGb_2630 | CDS          | Type II RMS, methylase                     | <i>M. bovis</i> PG45 (_0722)                          | <i>Mmc</i> GM12                |
| MAGb_2640 | CDS          | Type II RMS, methylase                     | <i>M. bovis</i> PG45 (_0723)                          | <i>Mcc</i> California Kid      |
| MAGb_2810 | pseudogene   | Type II RMS, endonuclease (C-term)         | <i>M. anatis</i> 1340                                 | <i>M. anatis</i> 1340          |
| MAGb_2820 | pseudogene   | Type II RMS, endonuclease (central region) | <i>MmmSC</i> Gladysdale                               | <i>MmmSC</i> Gladysdale        |
| MAGb_2830 | pseudogene   | Type II RMS, endonuclease (N-term)         | <i>MmmSC</i> PG1                                      | <i>MmmSC</i> PG1               |
| MAGb_2840 | CDS          | Type II RMS, methylase                     | <i>M. bovis</i> Hubei-1                               | <i>M. anatis</i> 1340          |
| MAGb_6200 | CDS          | Type II RMS, methylase                     | <i>M. bovis</i> PG45 (_0663)                          | <i>M. leachii</i> 99/014/6     |
| MAGb_6210 | pseudogene   | CHP (N-term), no predicted function        | <i>M. bovis</i> PG45 (_0662)                          | <i>M. leachii</i> 99/014/6     |
| MAGb_6220 | pseudogene   | CHP (C-term), no predicted function        | <i>M. leachii</i> PG50                                | <i>M. leachii</i> PG50         |
| MAGb_8010 | CDS          | CHP, no predicted function                 | <i>M. bovis</i> PG45 (_0189)                          | <i>M. leachii</i> 99/014/6     |
| MAGb_8020 | CDS          | CHP, no predicted function                 | <i>M. bovis</i> PG45 (_0190)                          | <i>M. leachii</i> PG50         |
| MAGb_8030 | CDS          | CHP, no predicted function                 | <i>M. leachii</i> PG50                                | <i>M. leachii</i> PG50         |

<sup>a</sup>Protein blast and tblastn analysis were run against Molligen 3.0 databasis using individual CDS from *M. agalactiae* 14628. For clarity, the 35 CDS from the prophage already shown in the supplemental Table S2 are not listed here. E-value >e-8 were considered non significant (no hit). When the best blast hit (BBH) was obtained in *M. bovis* strain PG45, the corresponding mnemonic is mentioned in brackets (MBOVPG45\_). CHP, Conserved Hypothetical Protein; HP, Hypothetical Protein; RMS, Restriction Modification System

Supplemental Table S4. List of CDSs from *M. agalactiae* 14628 strain predicted as candidates for HGT.

| Mnemonic                                                                                                      | Product                                   | BBH in <i>M. agalactiae/bovis</i> (without strain 14628) | BBH in Mollicutes (without <i>M. agalactiae/bovis</i> ) <sup>a</sup> | BBH in Spiroplasma group | Homologs in PG2 (if any) previously predicted as HGT <sup>b</sup> |
|---------------------------------------------------------------------------------------------------------------|-------------------------------------------|----------------------------------------------------------|----------------------------------------------------------------------|--------------------------|-------------------------------------------------------------------|
| <b>HGT predicted with the <i>Spiroplasma</i> phylogenetic group (that includes the “M. mycoides” cluster)</b> |                                           |                                                          |                                                                      |                          |                                                                   |
| MAGb_0020                                                                                                     | CDS19, ICE-related                        | MAGa6960                                                 | MCAP_0567                                                            | MCAP_0567                | No homolog in PG2                                                 |
| MAGb_0090                                                                                                     | CDS5, ICE-related                         | MAGa4920                                                 | MLC_2130                                                             | MLC_2130                 | <b>Only distant homolog (MAG4040)</b>                             |
| MAGb_0140                                                                                                     | CDSA, ICE-related                         | MAGa2990                                                 | MCAP_0560                                                            | MCAP_0560                | No homolog in PG2                                                 |
| MAGb_0150                                                                                                     | CDS1, ICE-related                         | MBOVPG45_0213                                            | MCAP0554                                                             | MCAP0554                 | No homolog in PG2                                                 |
| MAGb_0160                                                                                                     | CDS19, ICE-related                        | MMB_0376                                                 | MLC_2230                                                             | MLC_2230                 | <b>MAG3880 and MAG 3890</b>                                       |
| MAGb_0170                                                                                                     | CDS22, ICE-related                        | MAG3860                                                  | MCAP0571                                                             | MCAP0571                 | <b>MAG3360 and 3860</b>                                           |
| MAGb_0450                                                                                                     | Oxidoreductase                            | MAGa4360                                                 | MMCAP2_0258                                                          | MMCAP2_0258              | <b>MAG4120</b>                                                    |
| MAGb_0460                                                                                                     | CHP, predicted lipoprotein                | MAGa4370                                                 | MCAP0846                                                             | MCAP0846                 | <b>MAG4130</b>                                                    |
| MAGb_0540                                                                                                     | CHP, predicted lipoprotein, DUF285 family | MAGa4450                                                 | MLEA_007790                                                          | MLEA_007790              | <b>MAG4220</b>                                                    |
| MAGb_0550                                                                                                     | CHP, predicted lipoprotein                | MAGa4460                                                 | MCAP0843                                                             | MCAP0843                 | <b>MAG4230 and MAG4240</b>                                        |
| MAGb_0620                                                                                                     | CHP, DUF285 family                        | MAG4310                                                  | MSC_1005                                                             | MSC_1005                 | <b>MAG4310</b>                                                    |
| MAGb_0790                                                                                                     | Glycerol kinase                           | MAG4470                                                  | MCAP0218                                                             | MCAP0218                 | <b>MAG4470</b>                                                    |
| MAGb_0800                                                                                                     | Glycerol facilitator factor               | MAG4480                                                  | MPUT_0572                                                            | MPUT_0572                | <b>MAG4480</b>                                                    |
| MAGb_1010                                                                                                     | ABC transporter, permease                 | MAGa5070                                                 | MMCAP2_0869                                                          | MMCAP2_0869              | <b>MAG4600</b>                                                    |
| MAGb_1020                                                                                                     | ABC transporter, ATP-binding              | MAG4610                                                  | MSB_A0801                                                            | MSB_A0801                | <b>MAG4610</b>                                                    |
| MAGb_1030                                                                                                     | CHP                                       | MAG4620                                                  | MMCAP2_0868                                                          | MMCAP2_0868              | <b>MAG4620</b>                                                    |
| MAGb_1040                                                                                                     | CHP, predicted lipoprotein                | MAG4630                                                  | MPUT_0375                                                            | MPUT_0375                | <b>MAG4630</b>                                                    |
| MAGb_1050                                                                                                     | CHP, predicted lipoprotein                | MAGa5110                                                 | MPUT_0245                                                            | MPUT_0245                | <b>MAG4640</b>                                                    |
| MAGb_1250                                                                                                     | Esterase/lipase                           | MAGa5310                                                 | MCAP0445                                                             | MCAP0445                 | <b>MAG4840 and 4850</b>                                           |
| MAGb_1260                                                                                                     | Glycosyl transferase                      | MMB_0523                                                 | MCAP0063                                                             | MCAP0063                 | <b>MAG4860 and 4870</b>                                           |
| MAGb_1280                                                                                                     | Malate permease                           | MAGa5360                                                 | MMCAP2_0037                                                          | MMCAP2_0037              | <b>MAG4890</b>                                                    |
| MAGb_1330                                                                                                     | CHP, predicted lipoprotein                | MAGa5410                                                 | MMS_A0858                                                            | MMS_A0858                | <b>MAG4940</b>                                                    |
| MAGb_1340                                                                                                     | CHP, predicted lipoprotein                | MAGa5420                                                 | MCAP0723                                                             | MCAP0723                 | <b>MAG4950 and 4960</b>                                           |
| MAGb_1350                                                                                                     | Hexosephosphate transport protein         | MAG4970                                                  | MLEA_003800                                                          | MLEA_003800              | <b>MAG4970</b>                                                    |
| MAGb_2060                                                                                                     | Type I RMS, specificity subunit           | MBOVPG45_0238                                            | MSB_A0090                                                            | MSB_A0090                | Not predicted (MAG5720)                                           |
| MAGb_2070                                                                                                     | Type I RMS, methylase                     | MAGa6290                                                 | MSB_A0088                                                            | MSB_A0088                | Not predicted (MAG5730)                                           |
| MAGb_2100                                                                                                     | 5-formyltetrahydrofolate cyclo-ligase     | MAG5750                                                  | MMCAP2_0443                                                          | MMCAP2_0443              | <b>MAG5750</b>                                                    |
| MAGb_2110                                                                                                     | CHP, predicted transmembrane protein      | MAG5760                                                  | MMCAP2_0112                                                          | MMCAP2_0112              | <b>MAG5760</b>                                                    |
| MAGb_2120                                                                                                     | CHP, predicted lipoprotein                | MAG5770                                                  | MMCAP2_0293                                                          | MMCAP2_0293              | <b>MAG5770</b>                                                    |
| MAGb_2370                                                                                                     | CHP, predicted lipoprotein, Spma family   | MAGa6720                                                 | MMCAP2_0092                                                          | MMCAP2_0092              | No homolog in PG2                                                 |
| MAGb_2410                                                                                                     | CHP, predicted lipoprotein, Spma family   | MAGa6790                                                 | MLC_0790                                                             | MLC_0790                 | MAG6060                                                           |
| MAGb_2420                                                                                                     | CHP, predicted lipoprotein, Spma family   | /                                                        | MLC_0820                                                             | MLC_0820                 | No homolog in PG2                                                 |
| MAGb_2620                                                                                                     | Type II RMS, endonuclease                 | MBOVPG45_0721                                            | MMCAP2_0756                                                          | MMCAP2_0756              | No homolog in PG2                                                 |

|           |                                                     |               |             |             |                                |
|-----------|-----------------------------------------------------|---------------|-------------|-------------|--------------------------------|
| MAGb_2630 | Type II RMS, methylase                              | MMB_0669      | MMCAP2_0755 | MMCAP2_0755 | No homolog in PG2              |
| MAGb_2640 | Type II RMS, methylase                              | MBOVPG45_0723 | MCAP0049    | MCAP0049    | No homolog in PG2              |
| MAGb_2820 | Type II RMS (pseudo, central region), endonuclease  |               | MSC_0949    | MSC_0949    | No homolog in PG2              |
| MAGb_2830 | Type II RMS (pseudo, N-term), endonuclease          | MMB_0687      | MSC_0949    | MSC_0949    | No homolog in PG2              |
| MAGb_2840 | Type II RMS, methylase                              | MMB_0688      | MMS_A1042   | MMS_A1042   | Only distant homolog (MAG6680) |
| MAGb_2850 | CHP, predicted lipoprotein                          | MAGa7370      | MMCAP2_0396 | MMCAP2_0396 | <b>MAG6410</b>                 |
| MAGb_2880 | CDSE, ICE-related                                   | MAGa7400      | MMS_A0526   | MMS_A0526   | <b>MAG6440</b>                 |
| MAGb_2890 | CHP                                                 | MAG6460       | MCAP0494    | MCAP0494    | <b>MAG6450</b>                 |
| MAGb_2900 | CHP, predicted lipoprotein, DUF285 family           | MAG6460       | MSC_1005    | MSC_1005    | <b>MAG6460</b>                 |
| MAGb_2910 | CHP, Fic protein family                             | MAGa7460      | MSC_0192    | MSC_0192    | <b>MAG6470</b>                 |
| MAGb_2920 | CHP, predicted lipoprotein, DUF285 family           | MAGa7470      | MLEA_008710 | MLEA_008710 | <b>MAG6480 and 6490</b>        |
| MAGb_3010 | CHP, putative methylase (marMP)                     | MAG4030       | MCAP0556    | MCAP0556    | <b>MAG4030</b>                 |
| MAGb_3280 | CHP, potentially truncated in N-term                | MAGa7480      | MSC_1031d   | MSC_1031d   | Not predicted (MAG6510)        |
| MAGb_3290 | CHP (Pseudo, C-term), predicted lipoprotein         | MAGa7490      | MSC_0519    | MSC_0519    | <b>MAG6520</b>                 |
| MAGb_3300 | CHP (Pseudo, N-term), predicted lipoprotein         | MAG6520       | MLEA_002640 | MLEA_002640 | <b>MAG6520</b>                 |
| MAGb_3310 | Glycerol ABC transporter, permease                  | MAG6530       | MLEA_002650 | MLEA_002650 | <b>MAG6530</b>                 |
| MAGb_3320 | Glycerol transporter subunit B                      | MAGa7510      | MSB_A0465   | MSB_A0465   | <b>MAG6540</b>                 |
| MAGb_3330 | Glycerol ABC transporter, ATP-binding               | MAGa7520      | MCAP0454    | MCAP0454    | <b>MAG6550</b>                 |
| MAGb_3340 | CHP, predicted transmembrane protein                | MAG6570       | MLC_5290    | MLC_5290    | <b>MAG6560 and 6570</b>        |
| MAGb_3900 | Abortive infection protein AbiGI                    | MAGa8140      | MMCAP2_0161 | MMCAP2_0161 | No homolog in PG2              |
| MAGb_3910 | Abortive infection protein AbiGII                   | MAGa8130      | MSC_0175    | MSC_0175    | No homolog in PG2              |
| MAGb_4000 | CHP, predicted lipoprotein                          | MAGa8260      | MLEA_004250 | MLEA_004250 | <b>MAG7130</b>                 |
| MAGb_4140 | CHP, DUF285 family, potentially truncated in N-term | MAG7270       | MSC_1005    | MSC_1005    | <b>MAG7270</b>                 |
| MAGb_4450 | Esterase/lipase                                     | MAGa0050      | MLC_5050    | MLC_5050    | <b>MAG0030</b>                 |
| MAGb_4460 | Esterase/lipase                                     | MAG0040       | MCAP0445    | MCAP0445    | <b>MAG0040</b>                 |
| MAGb_4470 | NADH dependent flavin oxidoreductase                | MAG0050       | MMCAP2_0463 | MMCAP2_0463 | <b>MAG0050</b>                 |
| MAGb_4480 | Lipoate-protein ligase A                            | MAGa0080      | MLC_5020    | MLC_5020    | <b>MAG0060</b>                 |
| MAGb_4490 | Lipoate-protein ligase A                            | MAGa0090      | MLEA_002600 | MLEA_002600 | <b>MAG0070</b>                 |
| MAGb_4500 | CHP                                                 | MAGa0100      | MPUT_0111   | MPUT_0111   | <b>MAG0080</b>                 |
| MAGb_4510 | Glycine cleavage system H protein                   | MAGa0110      | MSB_A0457   | MSB_A0457   | <b>MAG0090</b>                 |
| MAGb_4520 | CHP                                                 | MAGa0120      | MPUT_0109   | MPUT_0109   | Not predicted (MAG0100)        |
| MAGb_4610 | CHP, predicted lipoprotein                          | MBOVPG45_0024 | MLEA_001450 | MLEA_001450 | <b>MAG0190 and 0200</b>        |
| MAGb_4620 | CHP, predicted lipoprotein, DUF285 family           | MAGa0220      | MPUT_0237   | MPUT_0237   | <b>MAG0210 to MAG0240</b>      |
| MAGb_4630 | CHP, predicted lipoprotein, DUF285 family           | MAGa0250      | MLEA_005940 | MPUT_0237   | <b>MAG0210 to MAG0240</b>      |
| MAGb_4720 | Oligopeptide ABC transporter, ATP-binding           | MAG0340       | MLC_8220    | MLC_8220    | <b>MAG0340</b>                 |
| MAGb_4730 | Oligopeptide ABC transporter, ATP-binding           | MAG0350       | MLC_8230    | MLC_8230    | <b>MAG0350</b>                 |
| MAGb_4740 | Oligopeptide ABC transporter, permease              | MAGa0360      | MSC_0966    | MSC_0966    | <b>MAG0360</b>                 |
| MAGb_4750 | Oligopeptide ABC transporter, permease              | MAGa0370      | MCAP0117    | MCAP0117    | <b>MAG0370</b>                 |
| MAGb_4760 | Oligopeptide ABC transporter, substrate-            | MAGa0380      | MCAP0116    | MCAP0116    | <b>MAG0380</b>                 |

|           |                                                                                    |               |             |             |                                    |
|-----------|------------------------------------------------------------------------------------|---------------|-------------|-------------|------------------------------------|
|           | binding protein, predicted lipoprotein                                             |               |             |             |                                    |
| MAGb_4770 | CHP, predicted transmembrane protein                                               | MAGa0390      | MMS_A1055   | MMS_A1055   | <b>MAG0390</b>                     |
| MAGb_5050 | Aspartate-ammonia ligase                                                           | MAG0640       | MSC_1015    | MSC_1015    | <b>MAG0640</b>                     |
| MAGb_5760 | CHP, DUF285 family                                                                 | MAGa1390      | MMCAP2_0891 | MMCAP2_0891 | <b>MAG1330 and 1340</b>            |
| MAGb_5890 | Glucose-inhibited division protein                                                 | MAGa1510      | MPUT_0540   | MPUT_0540   | <b>MAG1470</b>                     |
| MAGb_5910 | D-lactate dehydrogenase                                                            | MAGa1530      | MSC_0034    | MSC_0034    | <b>MAG1490</b>                     |
| MAGb_5920 | Esterase/lipase                                                                    | MAGa1540      | MLC_3540    | MLC_3540    | <b>MAG1500</b>                     |
| MAGb_5990 | ABC transporter, ATP binding protein                                               | MAGa1640      | MLC_5110    | MLC_5110    | Not predicted (MAG1630)            |
| MAGb_6000 | CHP, predicted membrane protein                                                    | MAG1640       | MLC_5120    | MLC_5120    | <b>MAG1640</b>                     |
| MAGb_6030 | CHP, predicted lipoprotein                                                         | MAG1670       | MMCAP2_0015 | MMCAP2_0015 | <b>MAG1670</b>                     |
| MAGb_6110 | CHP, predicted transmembrane protein                                               | MAGa1750      | MMCAP2_0594 | MMCAP2_0594 | Not predicted<br>(MAG1770/MAG1760) |
| MAGb_6200 | RMS, Cytosin-specific methylase, potentially truncated in N-term                   | MMB_0186      | MLEA_007530 | MLEA_007530 | No homolog in PG2                  |
| MAGb_6210 | CHP (Pseudo, N-term)                                                               | MMB_0187      | MLEA_007540 | MLEA_007540 | No homolog in PG2                  |
| MAGb_6220 | CHP (Pseudo, C-term)                                                               | MMB_0187      | MLEA_007540 | MLEA_007540 | No homolog in PG2                  |
| MAGb_6520 | Exodeoxyribonuclease V alpha chain                                                 | MBOVPG45_0626 | MLC_4920    | MLC_4920    | <b>MAG2150 and 2160</b>            |
| MAGb_6530 | CHP                                                                                | MAGa2190      | MLEA_000570 | MLEA_000570 | <b>MAG2170</b>                     |
| MAGb_6650 | CHP, predicted lipoprotein                                                         | MAG2220       | MCAP0451    | MCAP0451    | <b>MAG2220</b>                     |
| MAGb_6780 | Esterase/lipase                                                                    | MAGa2460      | MSB_A0456   | MSB_A0456   | <b>MAG2300</b>                     |
| MAGb_6790 | Glycerol ABC transporter, ATP-binding                                              | MAG2310       | MMCAP2_0456 | MMCAP2_0456 | <b>MAG2310</b>                     |
| MAGb_6800 | Glycerol ABC transporter, permease                                                 | MAGa2480      | MPUT_0596   | MPUT_0596   | <b>MAG2320</b>                     |
| MAGb_6810 | Glycerol ABC transporter, permease                                                 | MAGa2490      | MCAP0452    | MCAP0452    | <b>MAG2330</b>                     |
| MAGb_6820 | CHP, predicted lipoprotein                                                         | MAGa2500      | MLEA_002640 | MLEA_002640 | <b>MAG2340</b>                     |
| MAGb_6950 | NADH oxidase                                                                       | MAG2460       | MMS_A1115   | MMS_A1115   | <b>MAG2460</b>                     |
| MAGb_6960 | Proton/glutamate symporter                                                         | MAGa2640      | MLC_8900    | MLC_8900    | <b>MAG2470</b>                     |
| MAGb_7150 | Alkylphosphonate ABC transporter, substrate-binding protein, predicted lipoprotein | MAGa2820      | MMCAP2_0708 | MMCAP2_0708 | <b>MAG2690</b>                     |
| MAGb_7160 | ABC transporter, ATP-binding                                                       | MAGa2830      | MMCAP2_0707 | MMCAP2_0707 | <b>MAG2700</b>                     |
| MAGb_7170 | Alkylphosphonate ABC transporter, permease                                         | MAG2710       | MPUT_0398   | MPUT_0398   | <b>MAG2710</b>                     |
| MAGb_7180 | CHP                                                                                | MAGa2850      | MMCAP2_0080 | MMCAP2_0080 | <b>MAG2720</b>                     |
| MAGb_7290 | CHP, predicted transmembrane protein                                               | MAGa2960      | MSC_0626    | MSC_0626    | <b>MAG2830</b>                     |
| MAGb_7300 | CHP, predicted lipoprotein                                                         | MAG2840       | MPUT_0333   | MPUT_0333   | <b>MAG2840</b>                     |
| MAGb_7310 | CHP, predicted transmembrane protein                                               | MAGa3230      | MCAP0349    | MCAP0349    | <b>MAG2850</b>                     |
| MAGb_7320 | CHP, predicted transmembrane protein with mycoplasma virulence signal region       | MAGa3240      | MMS_A0697   | MMS_A0697   | <b>MAG2860</b>                     |
| MAGb_7330 | CHP, predicted lipoprotein                                                         | MAGa3250      | MPUT4160    | MPUT4160    | <b>MAG2870</b>                     |
| MAGb_7340 | CHP, predicted transmembrane protein                                               | MAGa3260      | MSB_A0365   | MSB_A0365   | <b>MAG2880</b>                     |
| MAGb_7350 | CHP                                                                                | MAGa3270      | MPUT_0337   | MPUT_0337   | <b>MAG2890</b>                     |
| MAGb_7360 | CHP                                                                                | MAG2900       | MSB_A0367   | MSB_A0367   | <b>MAG2900</b>                     |

|           |                                           |               |             |             |                         |
|-----------|-------------------------------------------|---------------|-------------|-------------|-------------------------|
| MAGb_7370 | CHP                                       | MAGa3290      | MLEA_001690 | MLEA_001690 | <b>MAG2910</b>          |
| MAGb_7380 | CHP, predicted transmembrane protein      | MAGa3300      | MLEA_001700 | MLEA_001700 | <b>MAG2920</b>          |
| MAGb_7390 | ATP synthase alpha chain                  | MAG2930       | MMCAP2_0576 | MMCAP2_0576 | <b>MAG2930</b>          |
| MAGb_7400 | ATP synthase beta chain                   | MAG2940       | MMS_A0679   | MMS_A0679   | <b>MAG2940</b>          |
| MAGb_7420 | CHP, predicted lipoprotein                | MAG2960       | MLC_8090    | MLC_8090    | <b>MAG2960</b>          |
| MAGb_7590 | CHP, predicted lipoprotein , DUF31 family | MAG3120       | MLC_2660    | MLC_2660    | <b>MAG3120</b>          |
| MAGb_7600 | Peptide methionine sulfoxide reductase    | MAG3130       | MPUT_0643   | MPUT0800    | <b>MAG3130</b>          |
| MAGb_7730 | CHP                                       | MAGa3660      | MLC_0350    | MLC_0350    | <b>MAG3330 and 3340</b> |
| MAGb_7920 | RMS, Cytosine-specific methyltransferase  | MAGa3950      | MLC_2020    | MLC_2020    | No homolog in PG2       |
| MAGb_7930 | HP                                        | /             | MLC_2030    | MLC_2030    | No homolog in PG2       |
| MAGb_7950 | Type III RMS (Pseudo, N-term), methylase  | MAGa1580      | MMCAP2_0590 | MMCAP2_0590 | Not predicted (MAG1530) |
| MAGb_7960 | Type III RMS (Pseudo, C-term), methylase  | MAG1530       | MMCAP2_0590 | MMCAP2_0590 | Not predicted (MAG1530) |
| MAGb_7980 | CDSG, ICE-related                         | MAGa6910      | MLC_2270    | MLC_2270    | No homolog in PG2       |
| MAGb_8000 | CDSF, ICE-related                         | MAGa6930      | MPUT_0387   | MPUT_0387   | No homolog in PG2       |
| MAGb_8010 | CHP                                       | MBOVPG45_0189 | MLEA_005850 | MLEA_005850 | No homolog in PG2       |
| MAGb_8020 | CHP                                       | MBOVPG45_0190 | MSB_A0621   | MSB_A0621   | No homolog in PG2       |
| MAGb_8030 | CHP                                       | /             | MSB_A0622   | MSB_A0622   | No homolog in PG2       |
| MAGb_8040 | CDSE, ICE-related                         | MAGa6950      | MMS_A0526   | MMS_A0526   | <b>MAG6440</b>          |
| MAGb_0580 | CHP                                       | MAGa4490      | Q9RQS4      | Q9RQS4      | <b>MAG4270</b>          |

---

**HGT predicted with the *Hominis* phylogenetic group**

---

|           |                                                                          |          |           |          |                   |
|-----------|--------------------------------------------------------------------------|----------|-----------|----------|-------------------|
| MAGb_0630 | Type III RMS, endonuclease                                               | MAGa3840 | MYPU_3950 | /        | No homolog in PG2 |
| MAGb_0640 | Type III RMS, methylase                                                  | MMB_0697 | MYPU_3960 | /        | No homolog in PG2 |
| MAGb_2610 | Transposase (Pseudo)                                                     | MMB_0522 | /         | /        | No homolog in PG2 |
| MAGb_2940 | CHP, putative HNH endonuclease, in prophage                              | /        | Mbvg_6650 | /        | No homolog in PG2 |
| MAGb_2950 | CHP, predicted ATP-dependent endonuclease of the OLD family, in prophage | /        | Mbvg_6660 | /        | No homolog in PG2 |
| MAGb_2960 | CHP, putative metallo-hydrolase/oxidoreductase, in prophage              | /        | Mbvg_6670 | /        | No homolog in PG2 |
| MAGb_2970 | CHP, in prophage                                                         | /        | Mbvg_6680 |          | No homolog in PG2 |
| MAGb_2980 | CHP, putative helicase, in prophage                                      | /        | Mbvg_6690 | MLC_3520 | No homolog in PG2 |
| MAGb_3000 | CHP, in prophage                                                         | MMB_0367 | /         | /        | No homolog in PG2 |
| MAGb_3050 | CHP, putative DUF669 family, in prophage                                 | /        | Mbvg_6710 | /        | No homolog in PG2 |
| MAGb_3060 | CHP, putative DNA polymerase, in prophage                                | /        | Mbvg_6730 | /        | No homolog in PG2 |
| MAGb_3070 | CHP, putative primase, in prophage                                       | /        | Mbvg_6740 | /        | No homolog in PG2 |
| MAGb_3080 | CHP, predicted transmembrane protein, in prophage                        | /        | Mbvg_6750 | /        | No homolog in PG2 |
| MAGb_3090 | CHP, predicted transmembrane protein, in                                 | /        | Mbvg_6760 | /        | No homolog in PG2 |



| prophage  |                                     |          |            |            |                   |
|-----------|-------------------------------------|----------|------------|------------|-------------------|
| MAGb_3110 | CHP, in prophage                    | /        | Mbvg_6770  | /          | No homolog in PG2 |
| MAGb_3120 | CHP, in prophage                    | MMB_0391 | Mbvg_6780  | /          | No homolog in PG2 |
| MAGb_3130 | HP, in prophage                     | MMB_0390 | /          | /          | No homolog in PG2 |
| MAGb_3140 | CHP, in prophage                    | MMB_0389 | MCJ_004820 | /          | No homolog in PG2 |
| MAGb_3150 | CHP, in prophage                    | /        | Mbvg_6810  | /          | No homolog in PG2 |
| MAGb_3170 | CHP, in prophage                    | /        | Mbvg_6840  | /          | No homolog in PG2 |
| MAGb_3180 | CHP, in prophage                    | /        | Mbvg_6850  | /          | No homolog in PG2 |
| MAGb_3190 | CHP, in prophage                    | /        | Mbvg_6860  | /          | No homolog in PG2 |
| MAGb_3200 | CHP, in prophage                    | /        | Mbvg_6870  | /          | No homolog in PG2 |
| MAGb_3210 | CHP, in prophage                    | /        | Mbvg_6880  | /          | No homolog in PG2 |
| MAGb_3220 | CHP, putative phage prohead protein | /        | Mbvg_6890  | /          | No homolog in PG2 |
| MAGb_3230 | CHP, putative phage portal protein  | /        | Mbvg_6900  | /          | No homolog in PG2 |
| MAGb_3240 | CHP, putative phage terminase       | /        | Mbvg_6910  | SPIC11_028 | No homolog in PG2 |
| MAGb_3250 | CHP, in prophage                    | /        | Mbvg_6920  | /          | No homolog in PG2 |

#### HGT predicted with the *Pneumoniae* phylogenetic group

|           |                                     |               |            |   |                                |
|-----------|-------------------------------------|---------------|------------|---|--------------------------------|
| MAGb_2990 | Type II RMS, methylase, in prophage | /             | MPN198     | / | No homolog in PG2              |
| MAGb_3270 | Integrase-recombinase, in prophage  | MBOVPG45_0822 | UUR10_0216 | / | Only distant homolog (MAG7110) |

#### HGT predicted outside the Mollicutes

|           |                                               |                                |               |             |                         |
|-----------|-----------------------------------------------|--------------------------------|---------------|-------------|-------------------------|
| MAGb_4640 | CHP YeiN, indigoidine synthase A-like protein | MAG0250                        | ACL_0802      | /           | Not predicted (MAG0250) |
| MAGb_4650 | CHP YeiC, ribokinase/pfkB sugar kinase        | MAGa0270                       | ACL_1374      | /           | Not predicted (MAG0260) |
| MAGb_3460 | N4-cytosine or N6-adenine DNA methylase       | MAGa7650                       | MCRO_0563     | MLC_1630    | <u>MAG6680</u>          |
| MAGb_7200 | Alcohol dehydrogenase                         | MAGa2870                       | MYPE4620      | SPIC102_019 | <u>MAG2740</u>          |
| MAGb_2810 | Type II RMS (pseudo, C-term), endonuclease    | /                              | GIG_00827     | /           | No homolog in PG2       |
| MAGb_0900 | Type II RMS, endonuclease                     | No homolog in PG2              | MBOVPG45_0366 | /           | /                       |
| MAGb_0910 | Type II RMS, methylase                        | Only distant homolog (MAG6680) | MBOVPG45_0365 | /           | MSC_0186                |

<sup>a</sup> A BlastP analysis was run against all Mollicutes genomes available in databases except those from *M. agalactiae* and *M. bovis* but including the CDSs from the *M. bovis* genitalium prophage (this work). The best blast hit (BBH) is indicated by its mnemonic.

<sup>b</sup> For comparison purpose, homologs in PG2 are also reported with their predictive status for HGT as determined previously (Sirand-Pugnet et al., PLoS Genet. 3:e75, 2007). The mnemonic for PG2 CDS are in bold when HGT was predicted with the "*M. mycoides*" cluster and underlined when predicted outside Mollicutes.



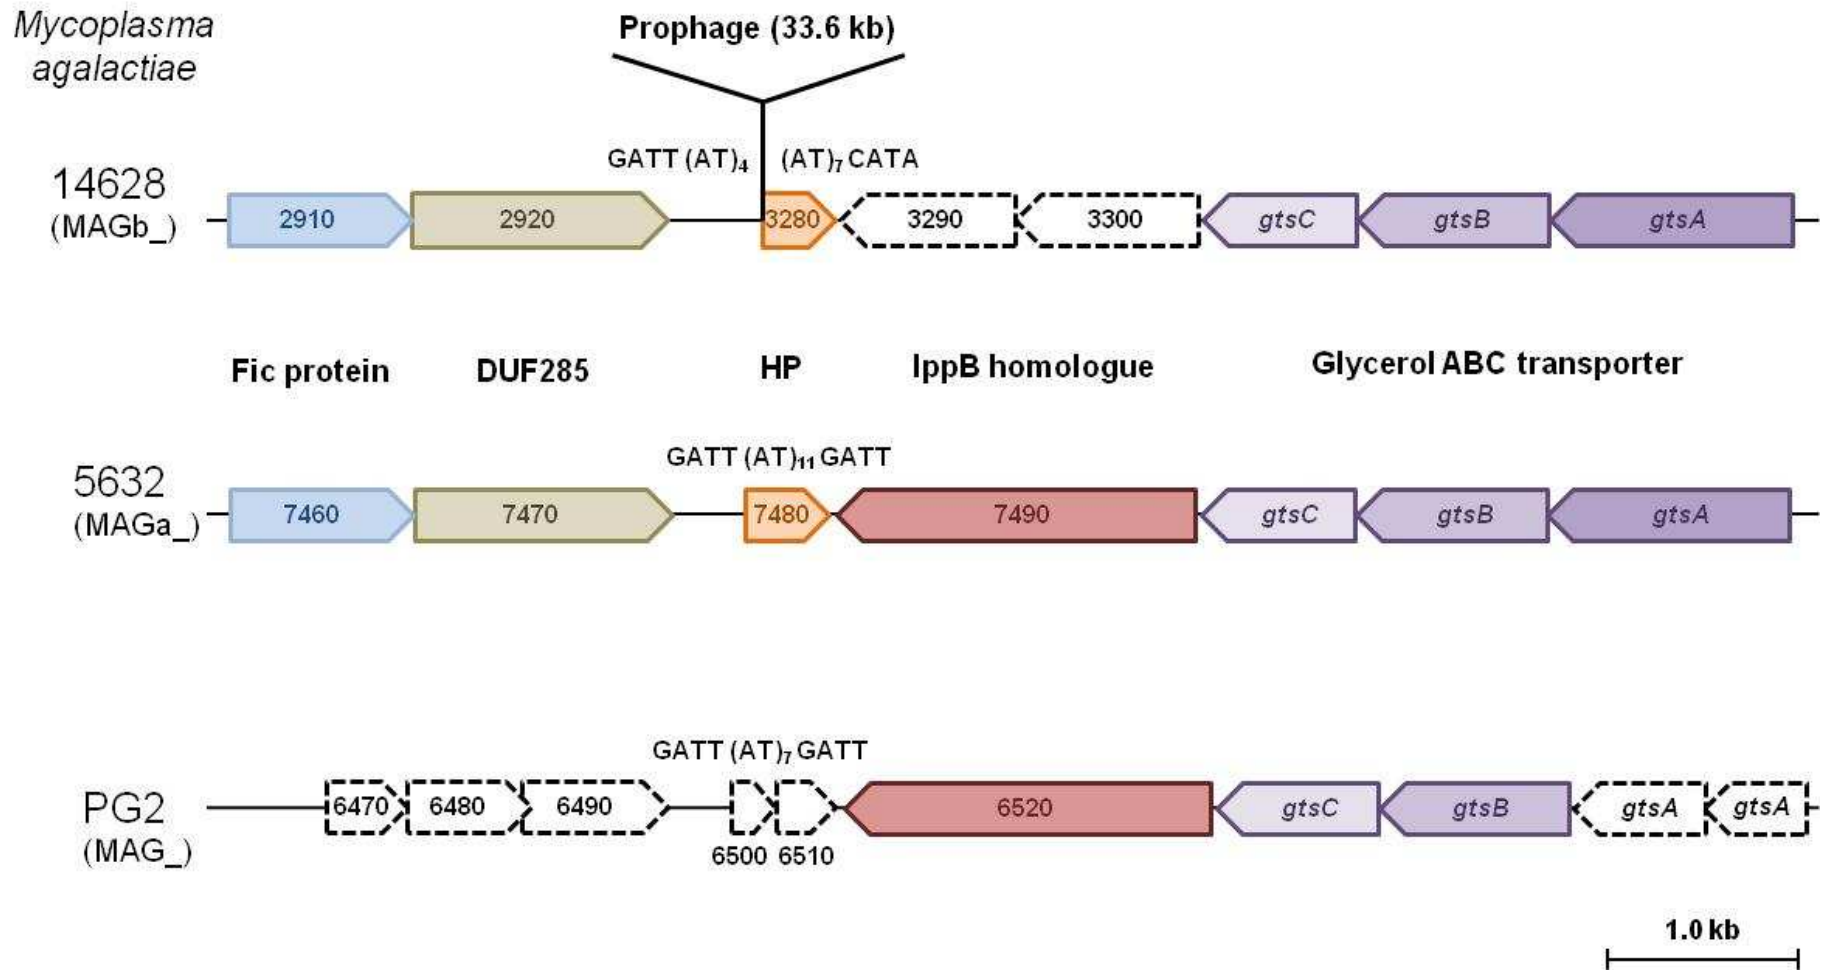

Supplemental Figure 1. Genomic location of the prophage insertion site in *M. agalactiae* 14628 and corresponding locations in strains 5632 and PG2. The 33.6 Kb prophage insertion site and flanking CDSs in the 14628 chromosome are represented along with the corresponding regions in the genome of 5632 and PG2. For each strain, CDSs are indicated according to their orientation in the chromosome and approximate sizes. CDS numbers refer to the mnemonic codification used for each strain in the Molligen 3.0 database. Homologous CDSs are indicated by a colour code. Pseudogenes are indicated in dotted lines. Genes belonging to the glycerol ABC transporter and CDSs products homologous to *M. mycoides* subsp. *mycoides* LppB lipoprotein were predicted to be involved in horizontal gene transfer between *M. agalactiae* and mycoplasmas of the “*M. mycoides*” cluster ((Sirand-Pugnet et al., PLoS Genet. 3:e75, 2007). Other CDS products belong to the FIC protein family (FIC protein), contain a domain of unknown function 285 (DUF285), or are hypothetical proteins (HP) with no homolog outside the *M. agalactiae* species. CDS Magb\_3280 (3280) is potentially truncated at N-terminal as the result of the prophage insertion at an AT rich region.
